# Supplementary material for: Molecular detection and characterization of resistant genes in Mycobacterium tuberculosis complex from DNA isolated from tuberculosis patients in the Eastern Cape province South Africa
Source: PubMed Central journal article supplement (PMC4161913; doi:10.1186/1471-2334-14-479), 2014-09-04

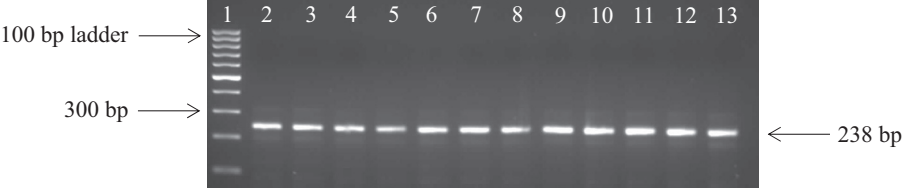

Supplement: 12879_2014_3784_MOESM2_ESM.pdf [file 12879_2014_3784_MOESM2_ESM.pdf]
